# Supplementary material for: Synthesis of well-defined linear–bottlebrush–linear triblock copolymer towards architecturally-tunable soft materials
Source: Royal Society of Chemistry journal article supplement (doi:10.1039/d2py00841f), 2022-01-01

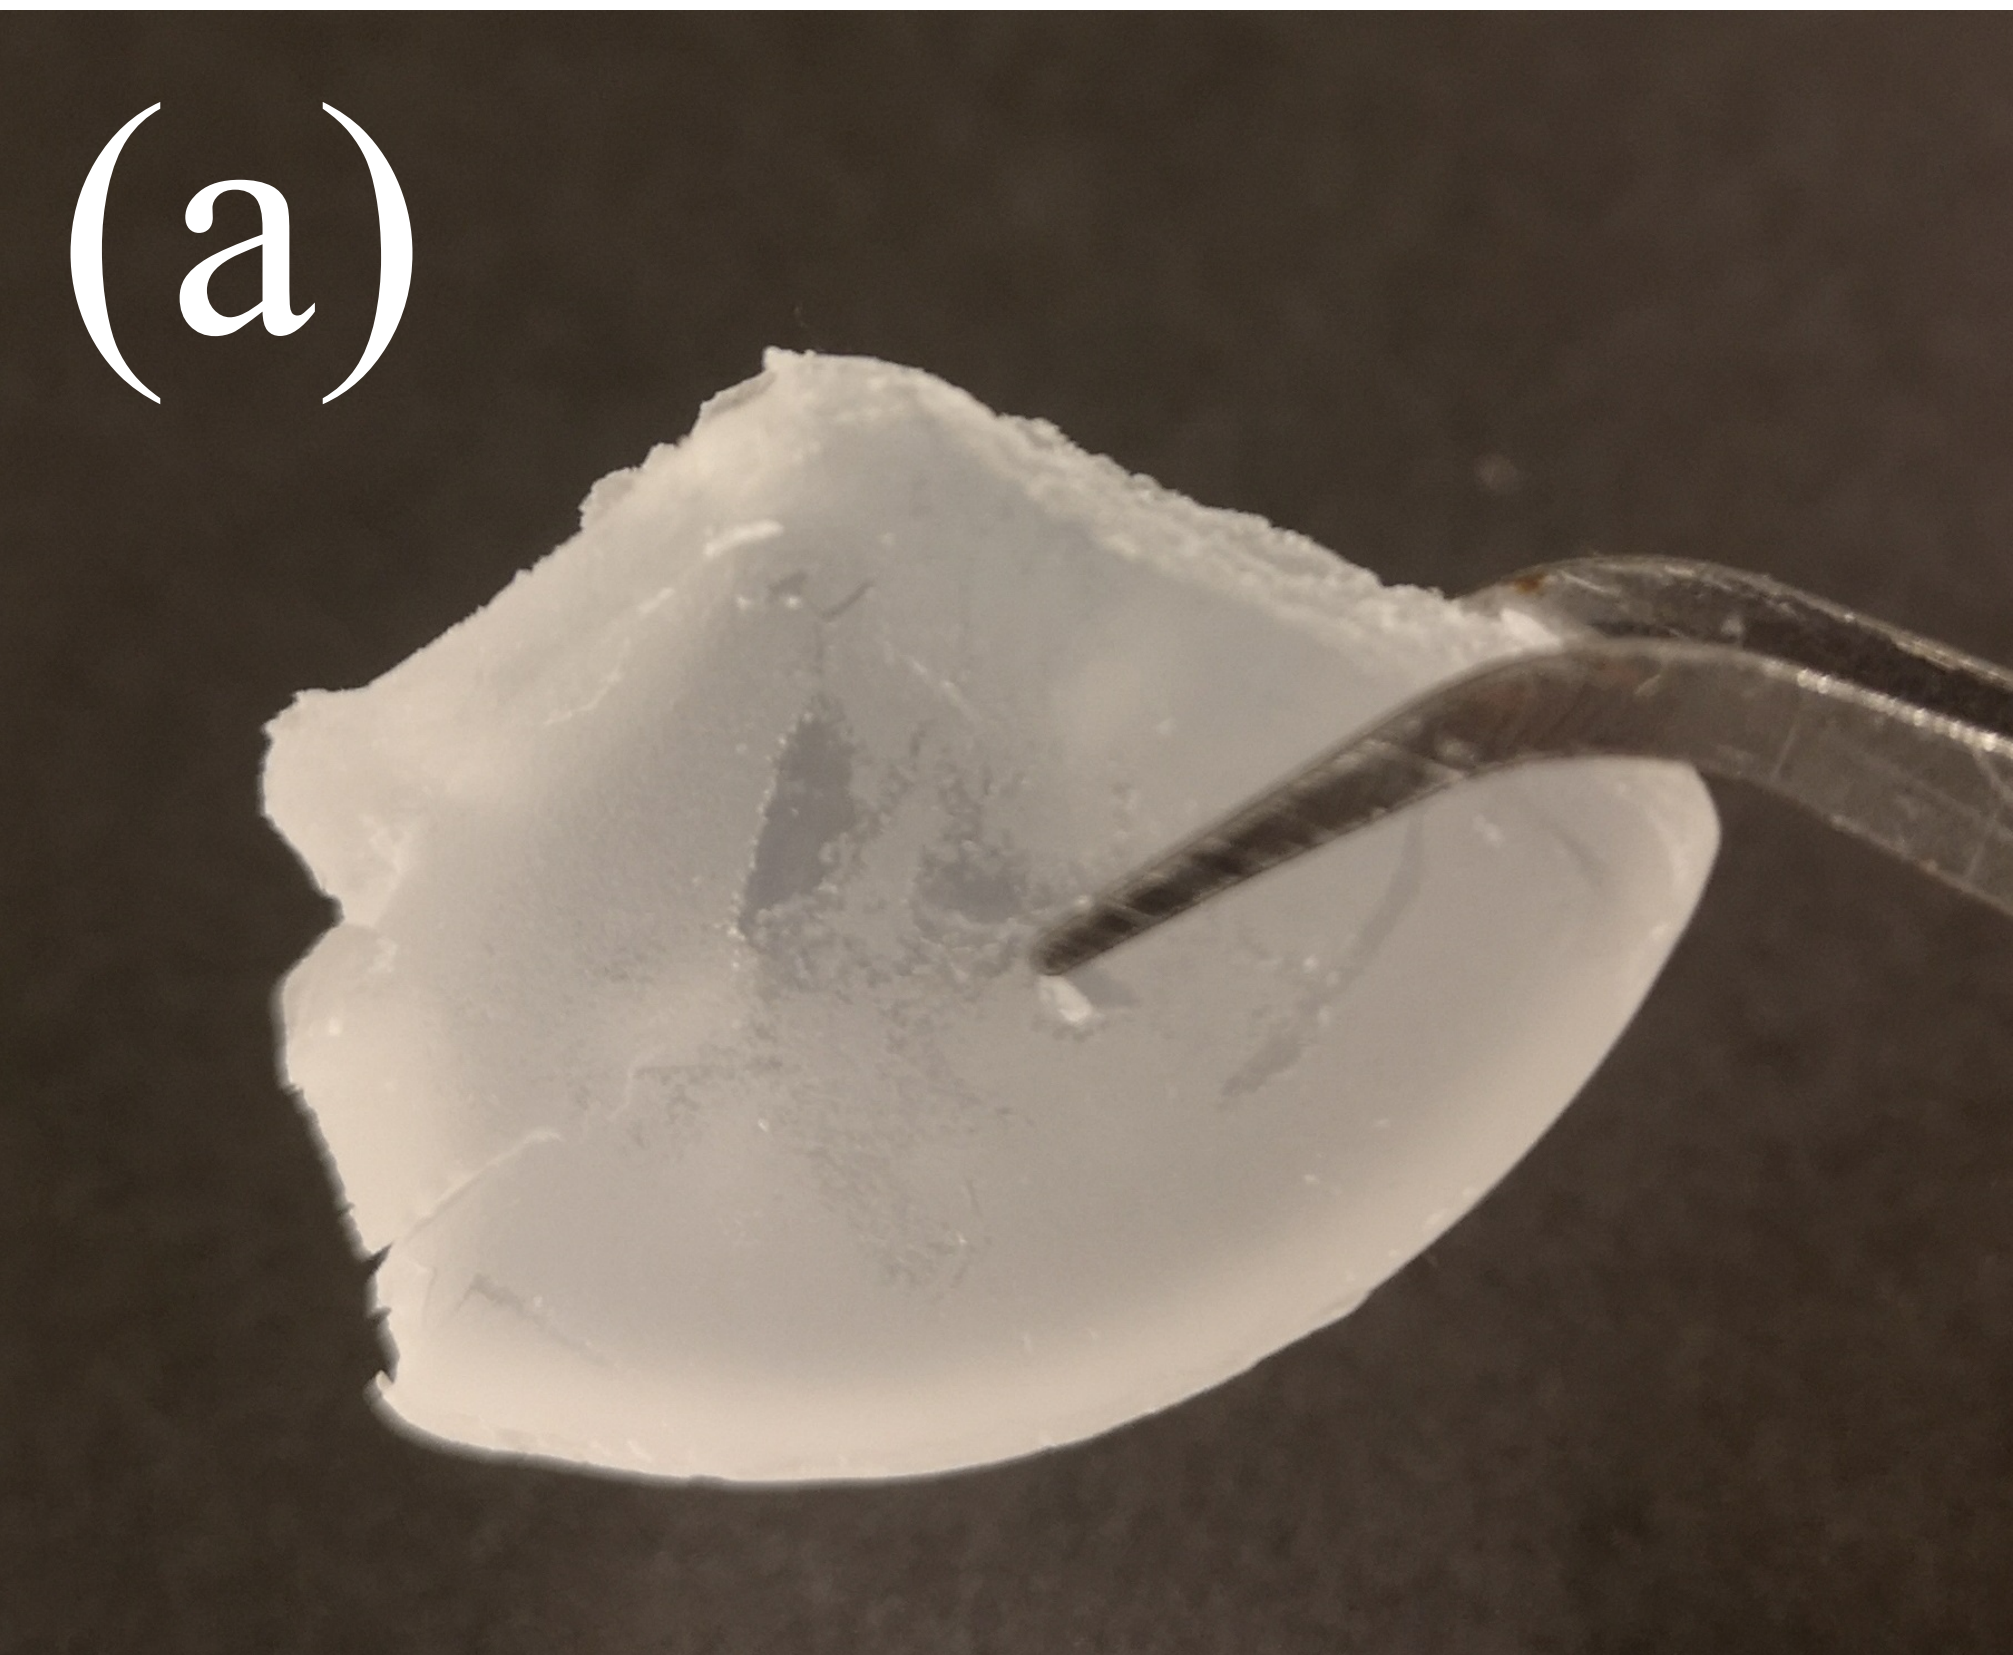

PS-*b*-PMVS

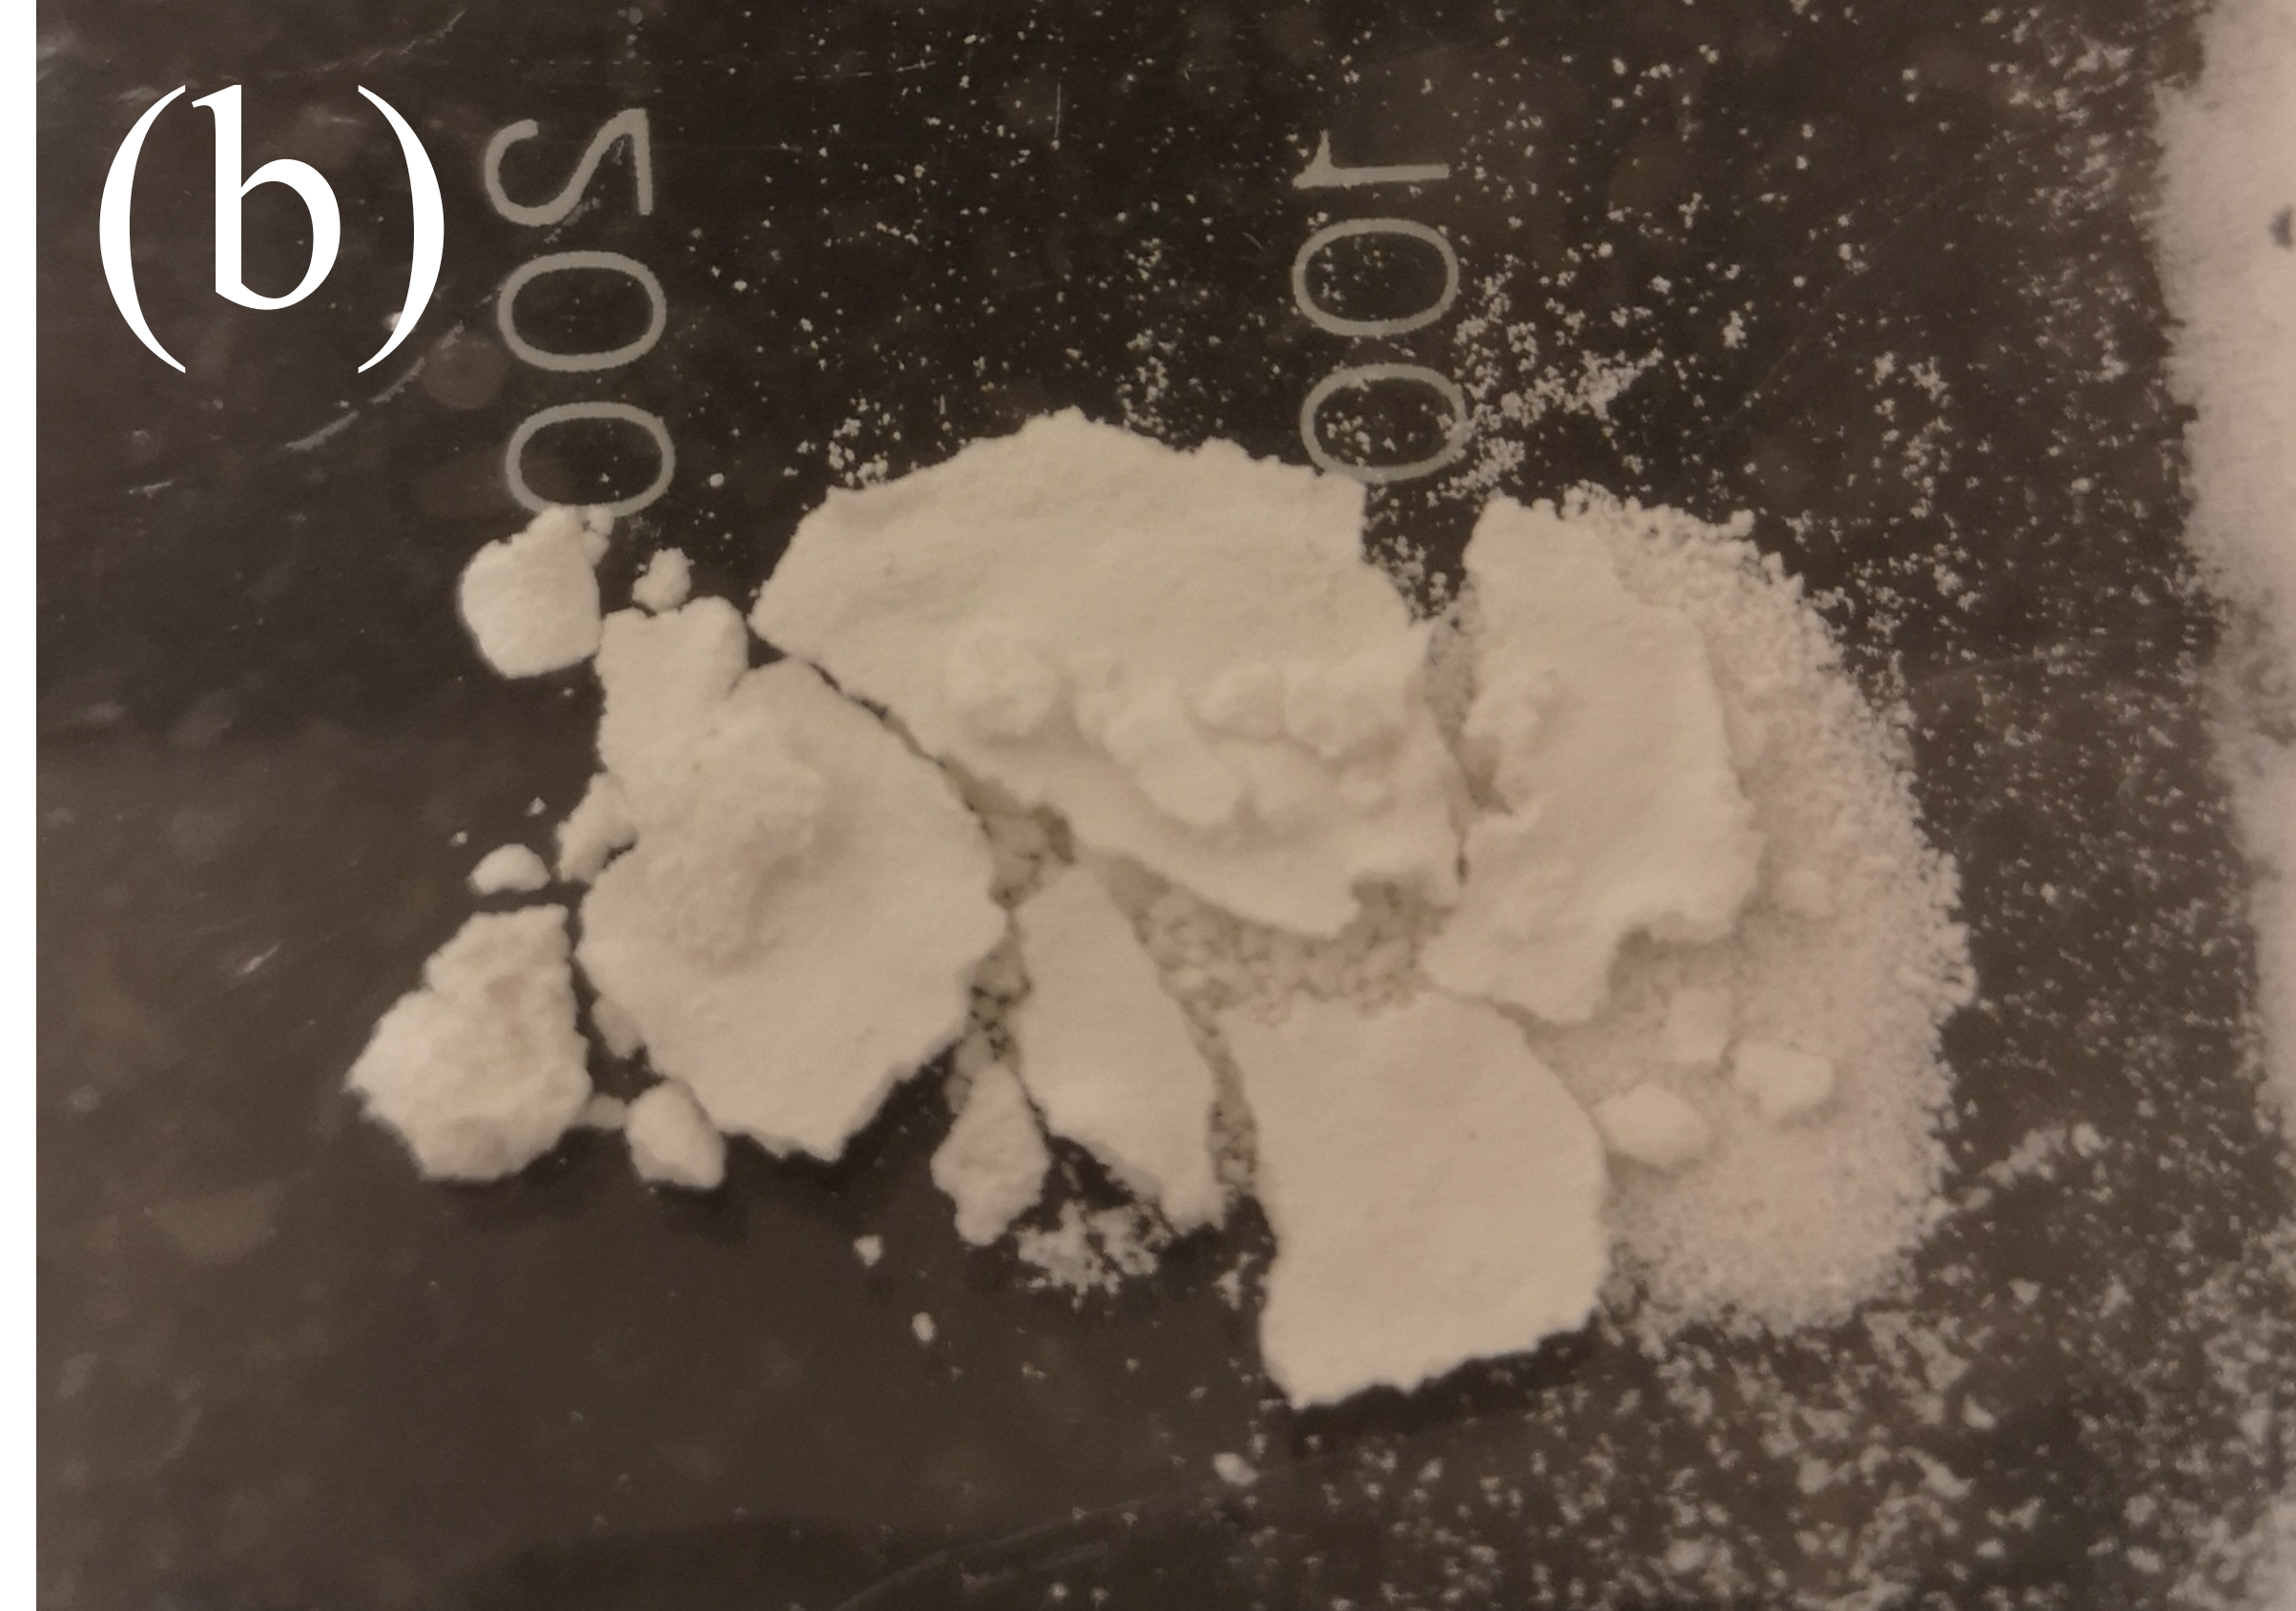

[ PS-*b*-PMVS  
PS-*b*-PMVS-*b*-PS  
PS

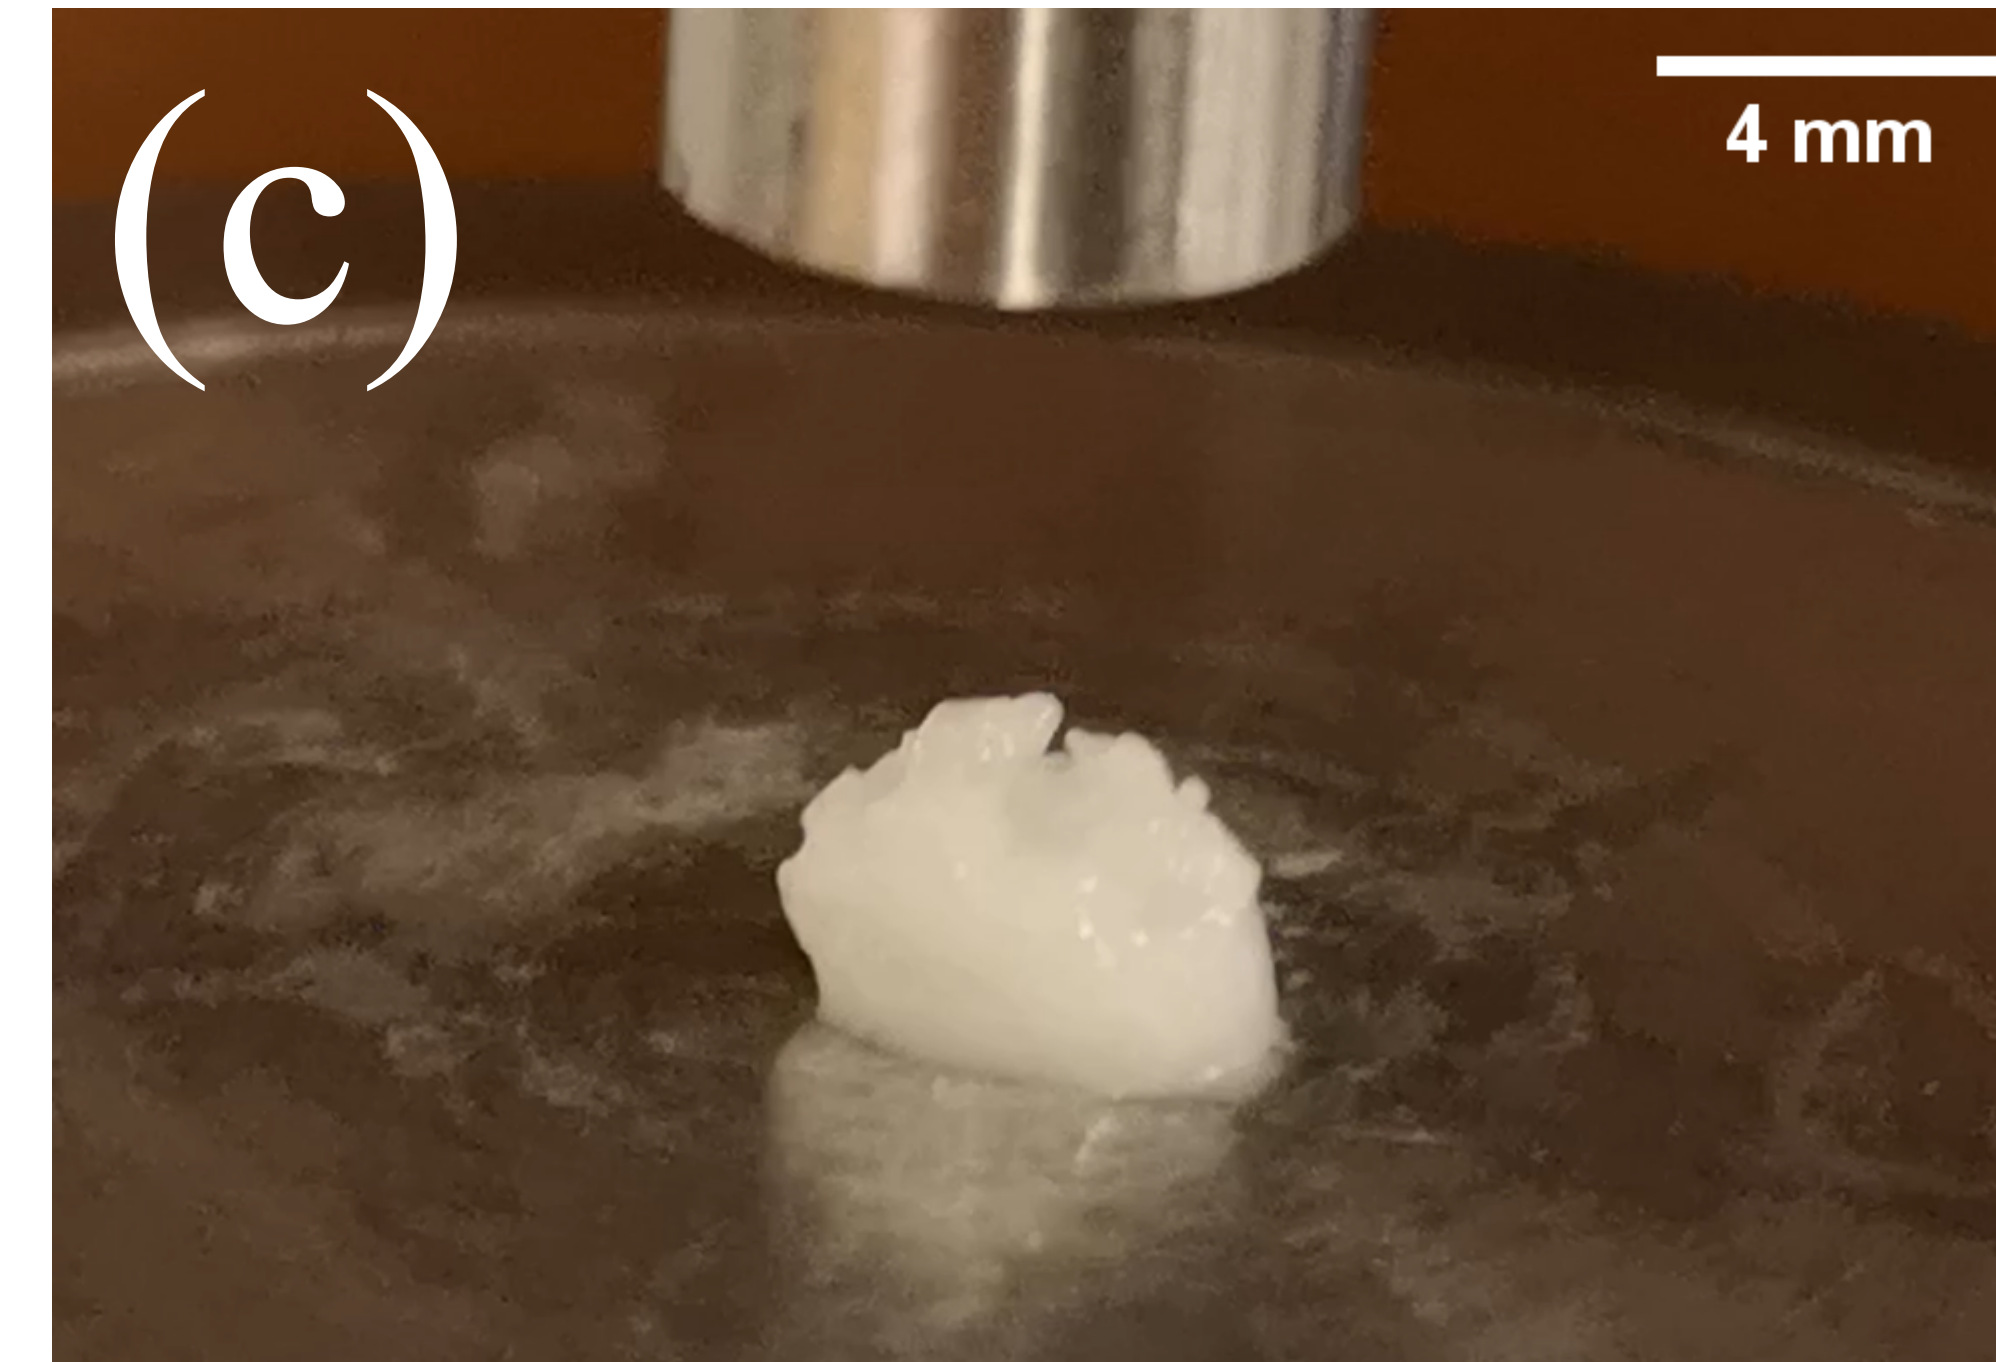

20 °C

Heating

140 °C

[ PS-*b*-bbPDMS  
PS-*b*-bbPDMS-*b*-PS

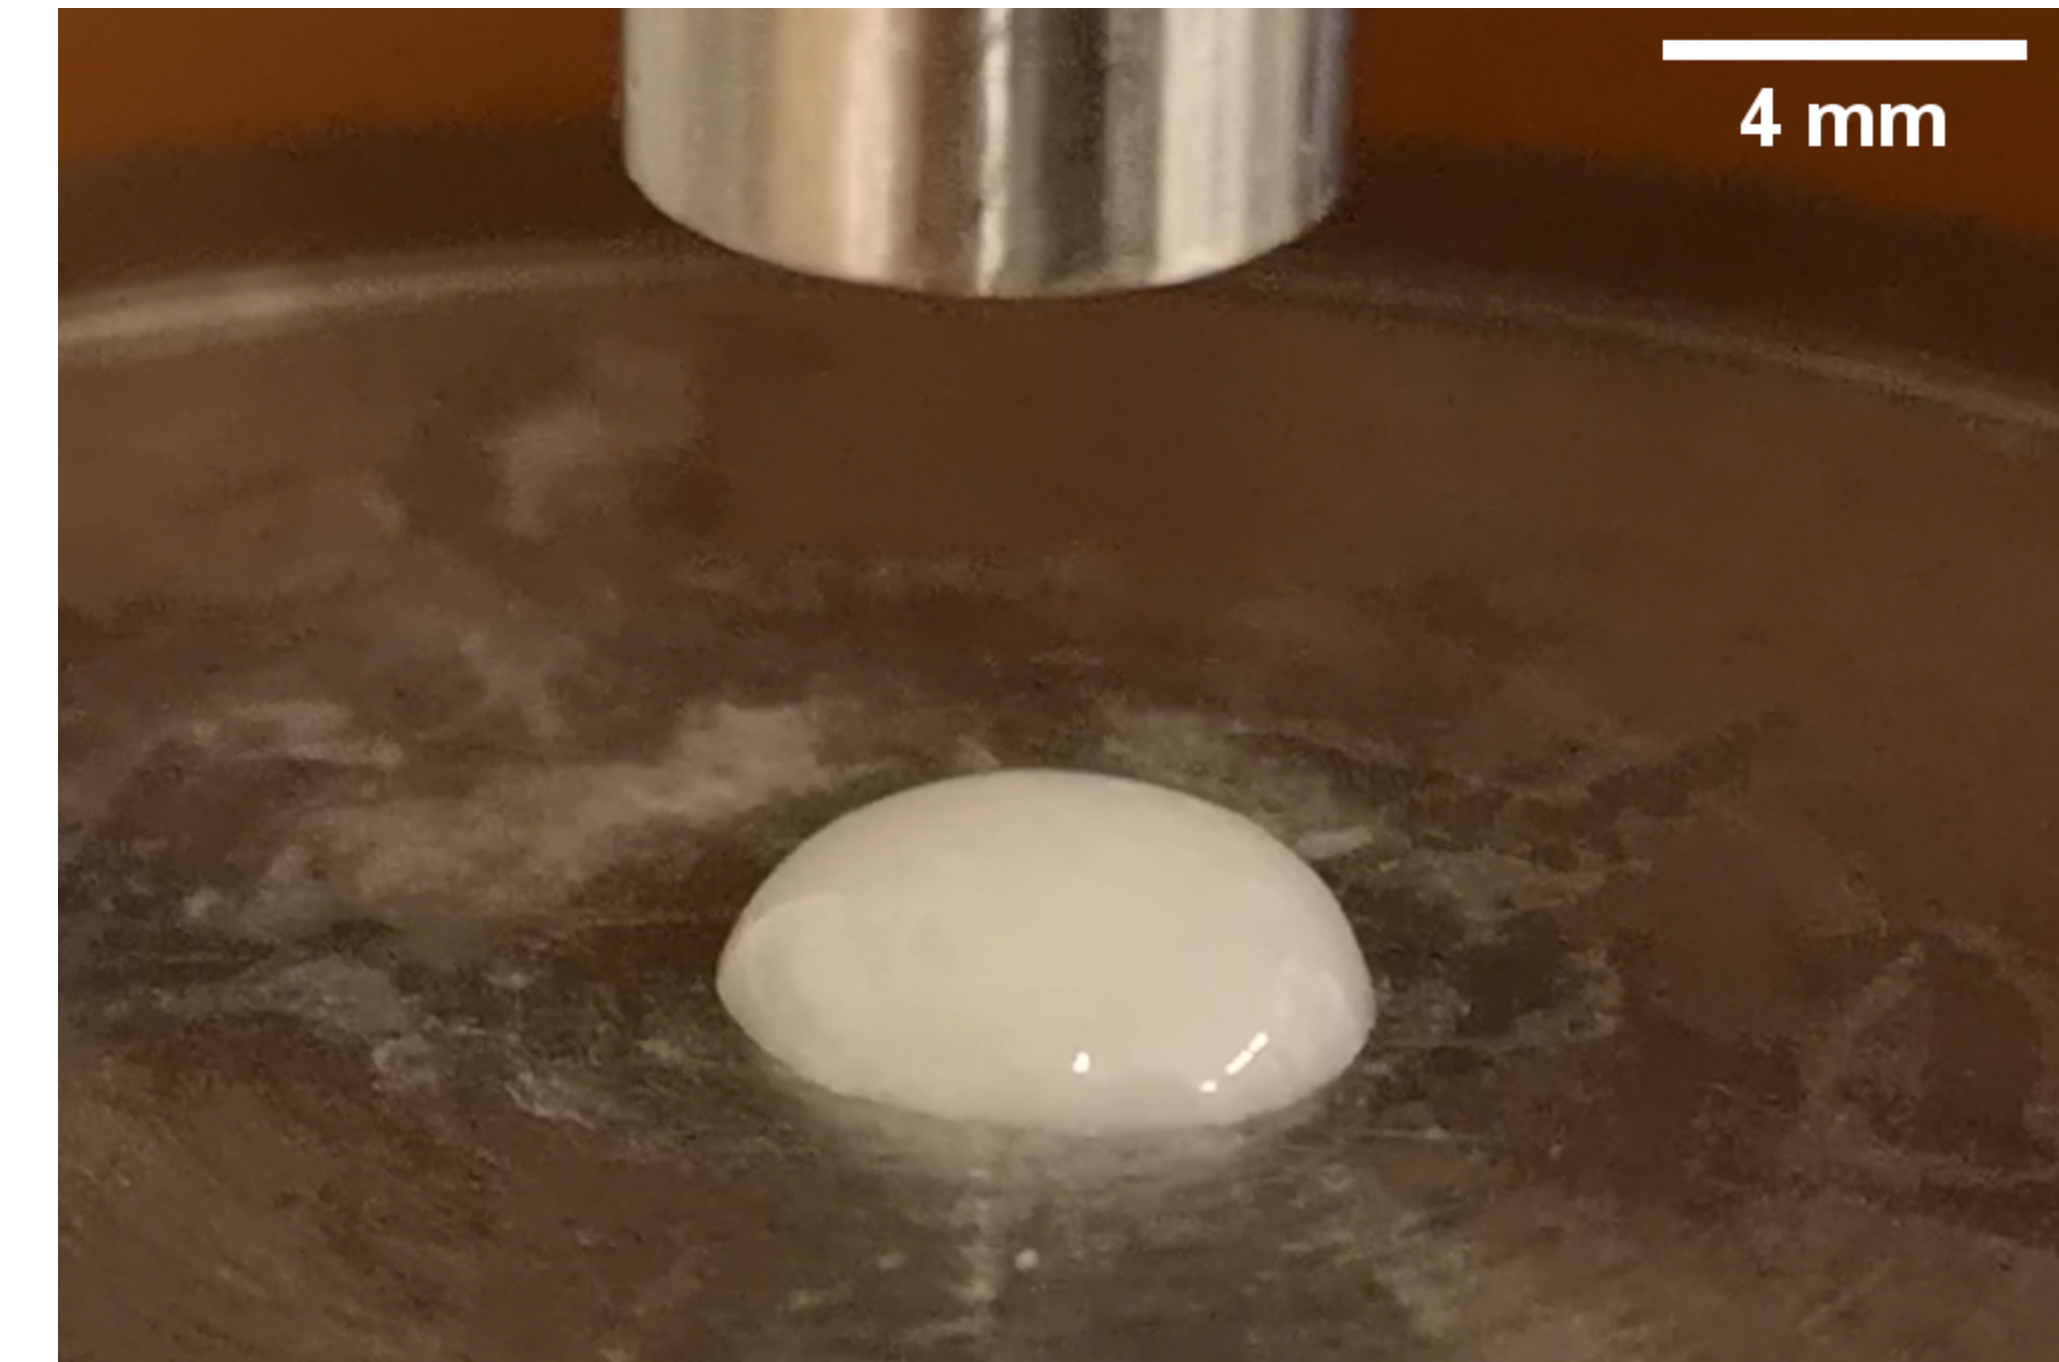

Supplement: d2py00841f2.zip [file d2py00841f2.zip]
