# Supplementary material for: Synthesis of well-defined linear–bottlebrush–linear triblock copolymer towards architecturally-tunable soft materials
Source: Royal Society of Chemistry journal article supplement (doi:10.1039/d2py00841f), 2022-01-01

Linear PS-*b*-PMVS diblock

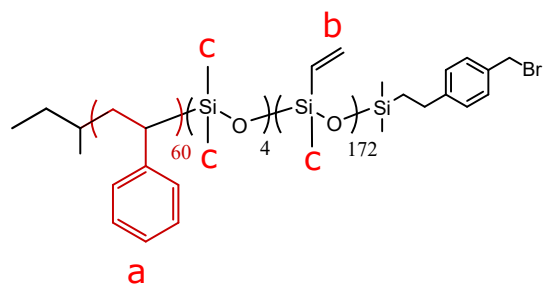

Linear PS-*b*-PMVS-*b*-PS triblock

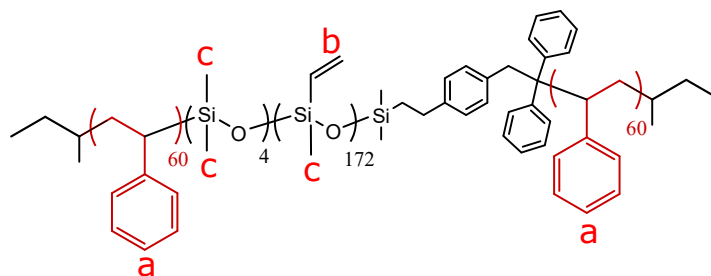

Excess PS

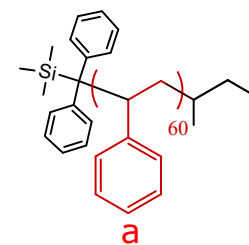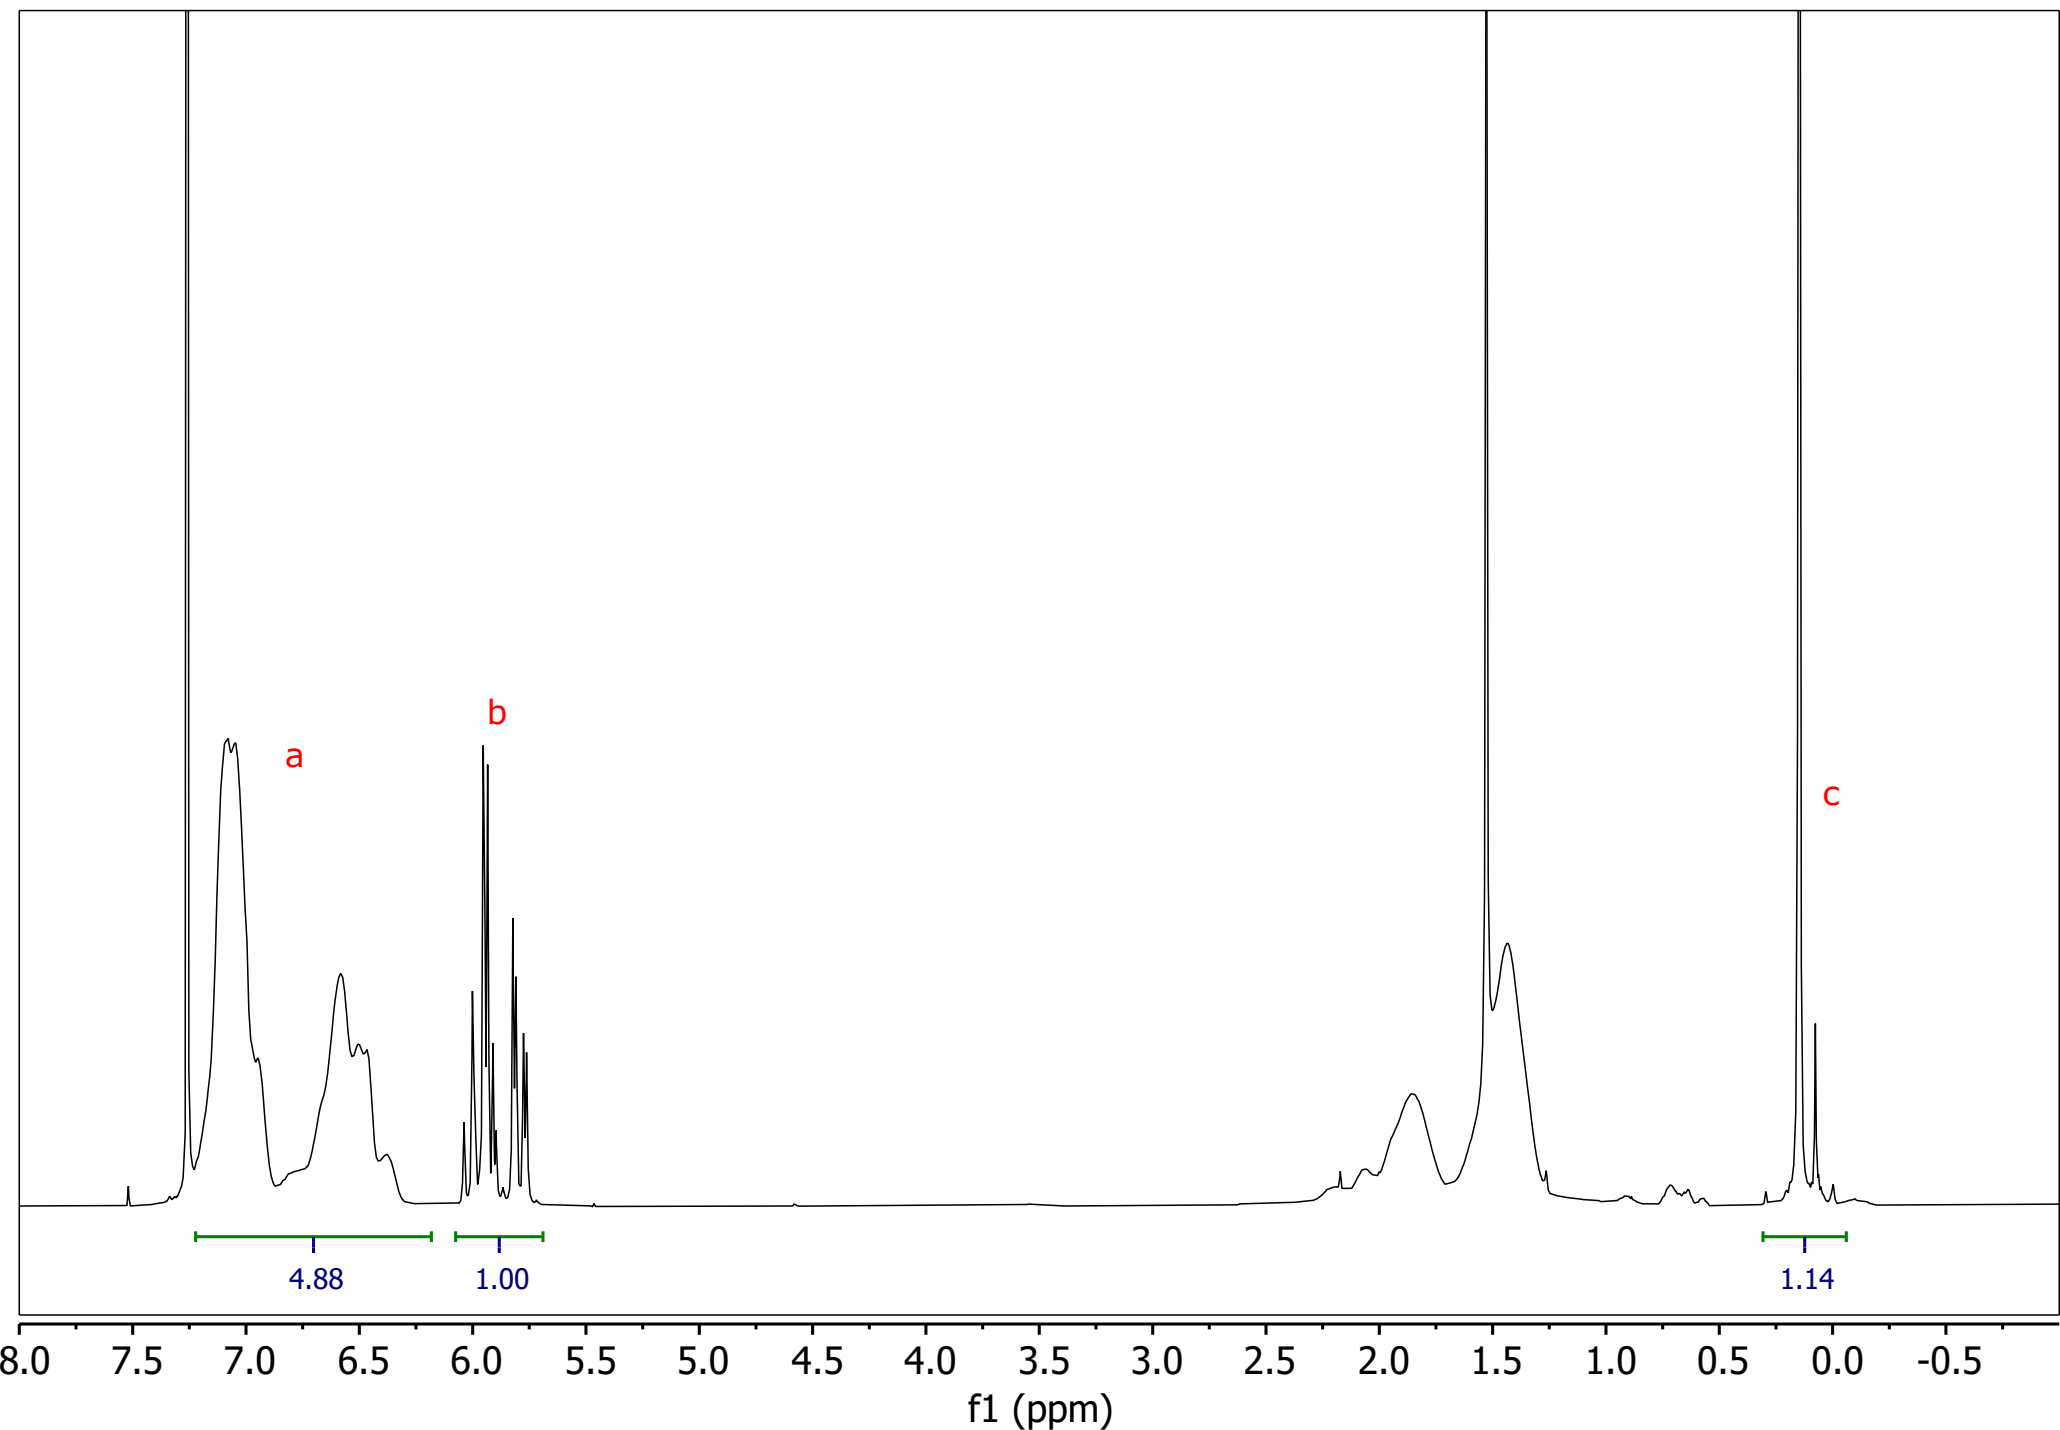

Supplement: d2py00841f2.zip [file d2py00841f2.zip]
